# Supplementary material for: Enzymatic Hydrolysis of Tenebrio molitor (Mealworm) Using Nuruk Extract Concentrate and an Evaluation of Its Nutritional, Functional, and Sensory Properties
Source: MDPI journal article supplement (doi:10.3390/foods12112188), 2023-05-29
Supplement: s1 [file s1]

## Supplementary materials

Table S1. Total amino acid composition of whole and defatted mealworm in g/100g of protein and compared with the FAO/WHO standard protein (2001)

| AA (g/100g of protein) | Whole Mealworm | Defatted Mealworm | Reference (FAO/WHO 2001) |
|------------------------|----------------|-------------------|--------------------------|
| Essential AA           |                |                   |                          |
| His                    | 3.49 ± 0.13    | 3.79 ± 0.06       | 1.5                      |
| Thr                    | 4.09 ± 0.16    | 4.04 ± 0.08       | 2.3                      |
| Lys                    | 5.89 ± 0.29    | 4.09 ± 0.21       | 4.5                      |
| Tyr                    | 8.70 ± 0.33    | 9.32 ± 0.24       | 7.5                      |
| Val                    | 6.82 ± 0.26    | 6.15 ± 0.16       | 3.9                      |
| Ilu                    | 4.51 ± 0.17    | 4.15 ± 0.10       | 3                        |
| Leu                    | 7.68 ± 0.31    | 7.24 ± 0.17       | 6.3                      |
| Phe                    | 4.21 ± 0.15    | 4.49 ± 0.08       |                          |
| Met                    | 1.93 ± 0.06    | 1.35 ± 0.03       |                          |
| Phe + Tyr              | 12.91 ± 0.48   | 13.81 ± 0.32      |                          |
| Cys + Met              | 2.10 ± 0.09    | 1.69 ± 0.05       | 2.2                      |
| Non Essential AA       |                |                   |                          |
| Ser                    | 4.65 ± 0.18    | 4.80 ± 0.09       |                          |
| Arg                    | 5.74 ± 0.20    | 5.99 ± 0.07       |                          |
| Gly                    | 5.53 ± 0.21    | 5.80 ± 0.07       |                          |
| Asp                    | 8.49 ± 0.32    | 6.14 ± 0.20       |                          |
| Glu                    | 12.83 ± 0.52   | 19.02 ± 0.55      |                          |
| Ala                    | 7.52 ± 0.31    | 6.92 ± 0.20       |                          |
| Pro                    | 7.46 ± 0.30    | 6.36 ± 0.15       |                          |
| Cys                    | 0.17 ± 0.03    | 0.34 ± 0.02       |                          |

Table S2: IC<sub>50</sub> in mg/ml of ABTS and ACE inhibition

| No | MW/Hydrolysate | ABTS Inhibition<br>IC <sub>50</sub> mg/ml | ACE inhibition<br>IC <sub>50</sub> mg/ml |
|----|----------------|-------------------------------------------|------------------------------------------|
| 1  | MW-DF          | 11.51 ± 0.11                              | 0.53 ± 0.01                              |
| 2  | MW-NEC         | 3.07 ± 0.03                               | 0.15 ± 0.00                              |
| 3  | MW-A           | 2.73 ± 0.02                               | 0.05 ± 00                                |
| 5  | MW-F           | 3.25 ± 0.01                               | 0.24 ± 0.01                              |

Table S3: Correlation matrix (Pearson) for biochemical/peptide composition and bioactivities and sensory properties

| Variables             | EAA           | TAA          | Sour          | ≥ 670 kDa     | Salt          | 6.7 - 1.7 kDa | NEAA         | ABTS IC <sub>50</sub> | ACE IC <sub>50</sub> | Sweet        | ≤ 1kDa       | Bitter       | Umami    |
|-----------------------|---------------|--------------|---------------|---------------|---------------|---------------|--------------|-----------------------|----------------------|--------------|--------------|--------------|----------|
| EAA                   | <b>1</b>      | 0.870        | <b>-0.951</b> | 0.758         | 0.664         | 0.355         | 0.712        | -0.637                | -0.350               | 0.586        | 0.107        | -0.005       | -0.024   |
| TAA                   | 0.870         | <b>1</b>     | -0.925        | 0.890         | 0.766         | 0.684         | <b>0.966</b> | -0.820                | -0.640               | 0.588        | 0.221        | 0.047        | 0.105    |
| Sour                  | <b>-0.951</b> | -0.925       | <b>1</b>      | -0.921        | -0.860        | -0.617        | -0.816       | 0.843                 | 0.620                | -0.777       | -0.381       | -0.252       | 0.201    |
| ≥ 670 kDa             | 0.758         | 0.890        | -0.921        | <b>1</b>      | <b>0.974</b>  | 0.872         | 0.868        | <b>-0.985</b>         | -0.876               | 0.880        | 0.639        | 0.498        | -0.339   |
| Salt                  | 0.664         | 0.766        | -0.860        | <b>0.974</b>  | <b>1</b>      | 0.875         | 0.741        | <b>-0.983</b>         | -0.906               | <b>0.961</b> | 0.787        | 0.676        | -0.539   |
| 6.7 - 1.7 kDa         | 0.355         | 0.684        | -0.617        | 0.872         | 0.875         | <b>1</b>      | 0.788        | -0.936                | <b>-0.992</b>        | 0.760        | 0.755        | 0.618        | -0.338   |
| NEAA                  | 0.712         | <b>0.966</b> | -0.816        | 0.868         | 0.741         | 0.788         | <b>1</b>     | -0.833                | -0.727               | 0.529        | 0.258        | 0.070        | 0.162    |
| ABTS IC <sub>50</sub> | -0.637        | -0.820       | 0.843         | <b>-0.985</b> | <b>-0.983</b> | -0.936        | -0.833       | <b>1</b>              | 0.945                | -0.896       | -0.736       | -0.601       | 0.409    |
| ACE IC <sub>50</sub>  | -0.350        | -0.640       | 0.620         | -0.876        | -0.906        | <b>-0.992</b> | -0.727       | 0.945                 | <b>1</b>             | -0.825       | -0.831       | -0.710       | 0.457    |
| Sweet                 | 0.586         | 0.588        | -0.777        | 0.880         | <b>0.961</b>  | 0.760         | 0.529        | -0.896                | -0.825               | <b>1</b>     | 0.867        | 0.804        | -0.742   |
| ≤ 1k Da               | 0.107         | 0.221        | -0.381        | 0.639         | 0.787         | 0.755         | 0.258        | -0.736                | -0.831               | 0.867        | <b>1</b>     | <b>0.981</b> | -0.864   |
| Bitter                | -0.005        | 0.047        | -0.252        | 0.498         | 0.676         | 0.618         | 0.070        | -0.601                | -0.710               | 0.804        | <b>0.981</b> | <b>1</b>     | -0.934   |
| Umami                 | -0.024        | 0.105        | 0.201         | -0.339        | -0.539        | -0.338        | 0.162        | 0.409                 | 0.457                | -0.742       | -0.864       | -0.934       | <b>1</b> |

Values in bold are different from 0 with a significance level alpha=0.05

ABTS and ACE inhibition were in mg/mL

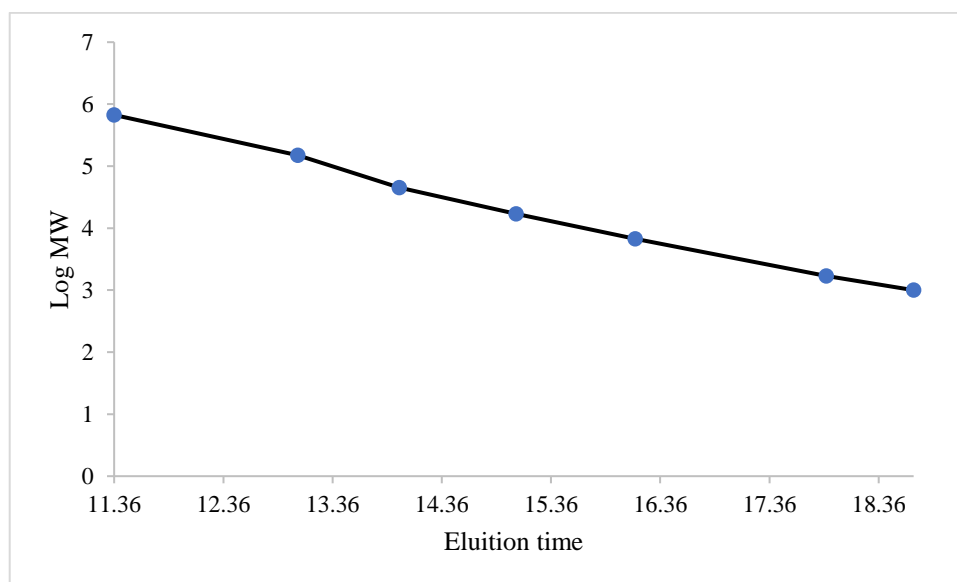

Figure S1. GPC calibration plot

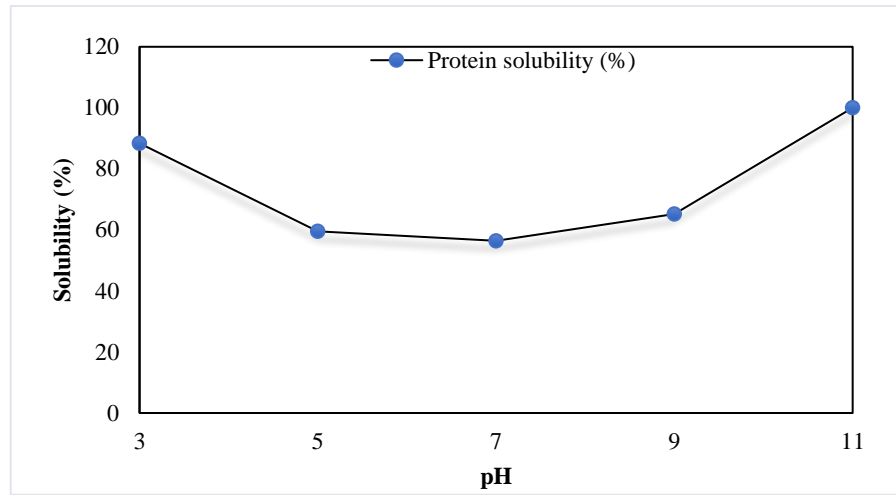

Figure S2. Solubility of defatted mealworm protein at different pH
